# Supplementary material
Source: PubMed Central journal article supplement (PMC5710322)
Supplement: jamaneurol-e171352-s001.pdf [file jamaneurol-e171352-s001.pdf]

## Supplementary Online Content

Frank S, Stamler D, Kayson E, et al; Huntington Study Group/Alternatives for Reducing Chorea in Huntington Disease Investigators. Safety of converting from tetrabenazine to deutetrabenazine for the treatment of chorea. *JAMA Neurol*. Published online July 1, 2017. doi:10.1001/jamaneurol.2017.1352

### **eTable.** Initial Dose Conversion

**This supplementary material has been provided by the authors to give readers additional information about their work.**

**eTable. Initial Dose Conversion**

| Prior total daily tetrabenazine dose | Initial total daily deutetabenazine dose | Initial daily deutetabenazine regimen |              |
|--------------------------------------|------------------------------------------|---------------------------------------|--------------|
|                                      |                                          | Morning dose                          | Evening dose |
| 12.5 mg                              | 6 mg                                     | 6 mg                                  | –            |
| 25 mg                                | 12 mg                                    | 6 mg                                  | 6 mg         |
| 37.5 mg                              | 18 mg                                    | 9 mg                                  | 9 mg         |
| 50 mg                                | 24 mg                                    | 12 mg                                 | 12 mg        |
| 62.5 mg                              | 30 mg                                    | 15 mg                                 | 15 mg        |
| 75 mg                                | 36 mg                                    | 18 mg                                 | 18 mg        |
| 87.5 mg                              | 42 mg                                    | 21 mg                                 | 21 mg        |
| 100 mg                               | 48 mg                                    | 24 mg                                 | 24 mg        |
